# Supplementary material
Source: PubMed Central journal article supplement (PMC7448647)
Supplement: JCM.00207-20-s0001.pdf [file JCM.00207-20-s0001.pdf]

**Supplement 1: STARD 2015 checklist (BMJ 2015;351:h5527 doi: 10.1136/bmj.h5527)**

| No. | Item                                                                                                                                                   | Fulfilled?             | Where?                | Page |
|-----|--------------------------------------------------------------------------------------------------------------------------------------------------------|------------------------|-----------------------|------|
| 1   | Identification as a study of diagnostic accuracy using at least one measure of accuracy (such as sensitivity, specificity, predictive values, or AUC)  | yes                    | Abstract              | 2    |
| 2   | Structured summary of study design, methods, results, and conclusions(for specific guidance, see STARD for Abstracts)                                  | yes                    | Abstract              | 2    |
| 3   | Scientific and clinical background ,including the intended use and clinical role of the index test                                                     | yes                    | Introduction          | 4    |
| 4   | Study objectives and hypotheses                                                                                                                        | yes                    | Introduction          | 4    |
| 5   | Whether data collection was planned before the index test and reference standard were performed (prospective study) or after (retrospective study)     | yes                    | Material and Methods  | 4    |
| 6   | Eligibility criteria                                                                                                                                   | yes                    | Materials and Methods | 4-5  |
| 7   | On what basis potentially eligible participants were identified (such as symptoms, results from previous tests, inclusion in registry)                 | yes                    | Materials and Methods | 4-5  |
| 8   | Where and when potentially eligible participants were identified (setting, location, and dates)                                                        | yes                    | Materials and Methods | 4-5  |
| 9   | Whether participants formed a consecutive, random, or convenience series                                                                               | yes                    | Materials and Methods | 4-5  |
| 10a | Index test, in sufficient detail to allow replication                                                                                                  | yes                    | Materials and Methods | 6-7  |
| 10b | Reference standard, in sufficient detail to allow replication                                                                                          | yes                    | Materials and Methods | 5-6  |
| 11  | Rationale for choosing the reference standard (if alternatives exist)                                                                                  | yes                    | Materials and Methods | 5-6  |
| 12a | Definition of and rationale for test positivity cut-offs or result categories of the index test, distinguishing pre-specified from exploratory         | yes                    | Materials and Methods | 6-7  |
| 12b | Definition of and rationale for test positivity cut-offs or result categories of the reference standard, distinguishing pre-specified from exploratory | yes                    | Materials and Methods | 5-6  |
| 13a | Whether clinical information and reference standard results were available to the performers or readers of the index test                              | yes                    | Materials and Methods | 6+7  |
| 13b | Whether clinical information and index test results were available to the assessors of the reference standard                                          | yes                    | Materials and Methods | 6+7  |
| 14  | Methods for estimating or comparing measures of diagnostic accuracy                                                                                    | yes                    | Statistics            | 7    |
| 15  | How indeterminate index test or reference standard results were handled                                                                                | no indeterminate tests |                       | 6+7  |
| 16  | How missing data on the index test and reference standard were handled                                                                                 | yes                    | Results               | 8    |

|     |                                                                                                             |                                                |                 |     |
|-----|-------------------------------------------------------------------------------------------------------------|------------------------------------------------|-----------------|-----|
| 17  | Any analyses of variability in diagnostic accuracy, distinguishing pre-specified from explorator            | no                                             | ---             |     |
| 18  | Intended sample size and how it was determined                                                              | not applicable                                 |                 | 4   |
| 19  | Flow of participants, using a diagram                                                                       | no                                             | ---             |     |
| 20  | Baseline demographic and clinical characteristics of participants                                           | yes                                            | Results         | 7-8 |
| 21a | Distribution of severity of disease in those with the target condition                                      | information not available                      |                 |     |
| 21b | Distribution of alternative diagnoses in those without the target condition                                 | yes                                            | Results         | 8   |
| 22  | Time interval and any clinical interventions between index test and reference standard                      | yes                                            | Methods         | 4   |
| 23  | Cross tabulation of the index test results (or their distribution) by the results of the reference standard | yes                                            | Supplement 2    |     |
| 24  | Estimates of diagnostic accuracy and their precision (such as 95% confidence intervals)                     | yes                                            | Results         | 8+9 |
| 25  | Any adverse events from performing the index test or the reference standard                                 | retrospective study                            |                 | 4   |
| 26  | Study limitations, including sources of potential bias, statistical uncertainty, and generalisability       | yes                                            | Discussion      | 15  |
| 27  | Implications for practice, including the intended use and clinical role of the index test                   | yes                                            | Discussion      | 16  |
| 28  | Registration number and name of registry                                                                    | retrospective study; IRB-2020-011 PMU Nürnberg |                 | 4   |
| 29  | Where the full study protocol can be accessed                                                               | retrospective study                            |                 |     |
| 30  | Sources of funding and other support; role of funders                                                       | yes                                            | Acknowledgement | 17  |
