# Supplementary material
Source: PubMed Central journal article supplement (PMC7448647)
Supplement: JCM.00207-20-s0002.pdf [file JCM.00207-20-s0002.pdf]

| ELISA test result<br>cut-off 100 pg/mL | definite LNB | non-LNB | total |
|----------------------------------------|--------------|---------|-------|
| positive                               | 33           | 7       | 40    |
| negative                               | 1            | 39      | 40    |
| total                                  | 34           | 46      | 80    |

**Supplementary Table 1:** Cross tabulation of the CXCL13-ELISA (cut-off 100 pg/mL)

| ELISA test result<br>cut-off 78.6 pg/mL | definite LNB | non-LNB | total |
|-----------------------------------------|--------------|---------|-------|
| positive                                | 34           | 7       | 41    |
| negative                                | 0            | 39      | 39    |
| total                                   | 34           | 46      | 80    |

**Supplementary Table 2:** Cross tabulation of the CXCL13-ELISA (cut-off 78.6 pg/mL)

| LFA test result cut-<br>off 22.5 AV | definite LNB | non-LNB | total |
|-------------------------------------|--------------|---------|-------|
| positive                            | 31           | 3       | 34    |
| negative                            | 3            | 43      | 46    |
| total                               | 34           | 46      | 80    |

**Supplementary Table 3:** Cross tabulation of the CXCL13-LFA (cut-off 22.5 AV)
